# Supplementary material
Source: HighWire-hosted journal article supplement (https://bmjopen.bmj.com/content/10/1/e032426)
Supplement: inline-supplementary-material-2 [file inline-supplementary-material-2.pdf]

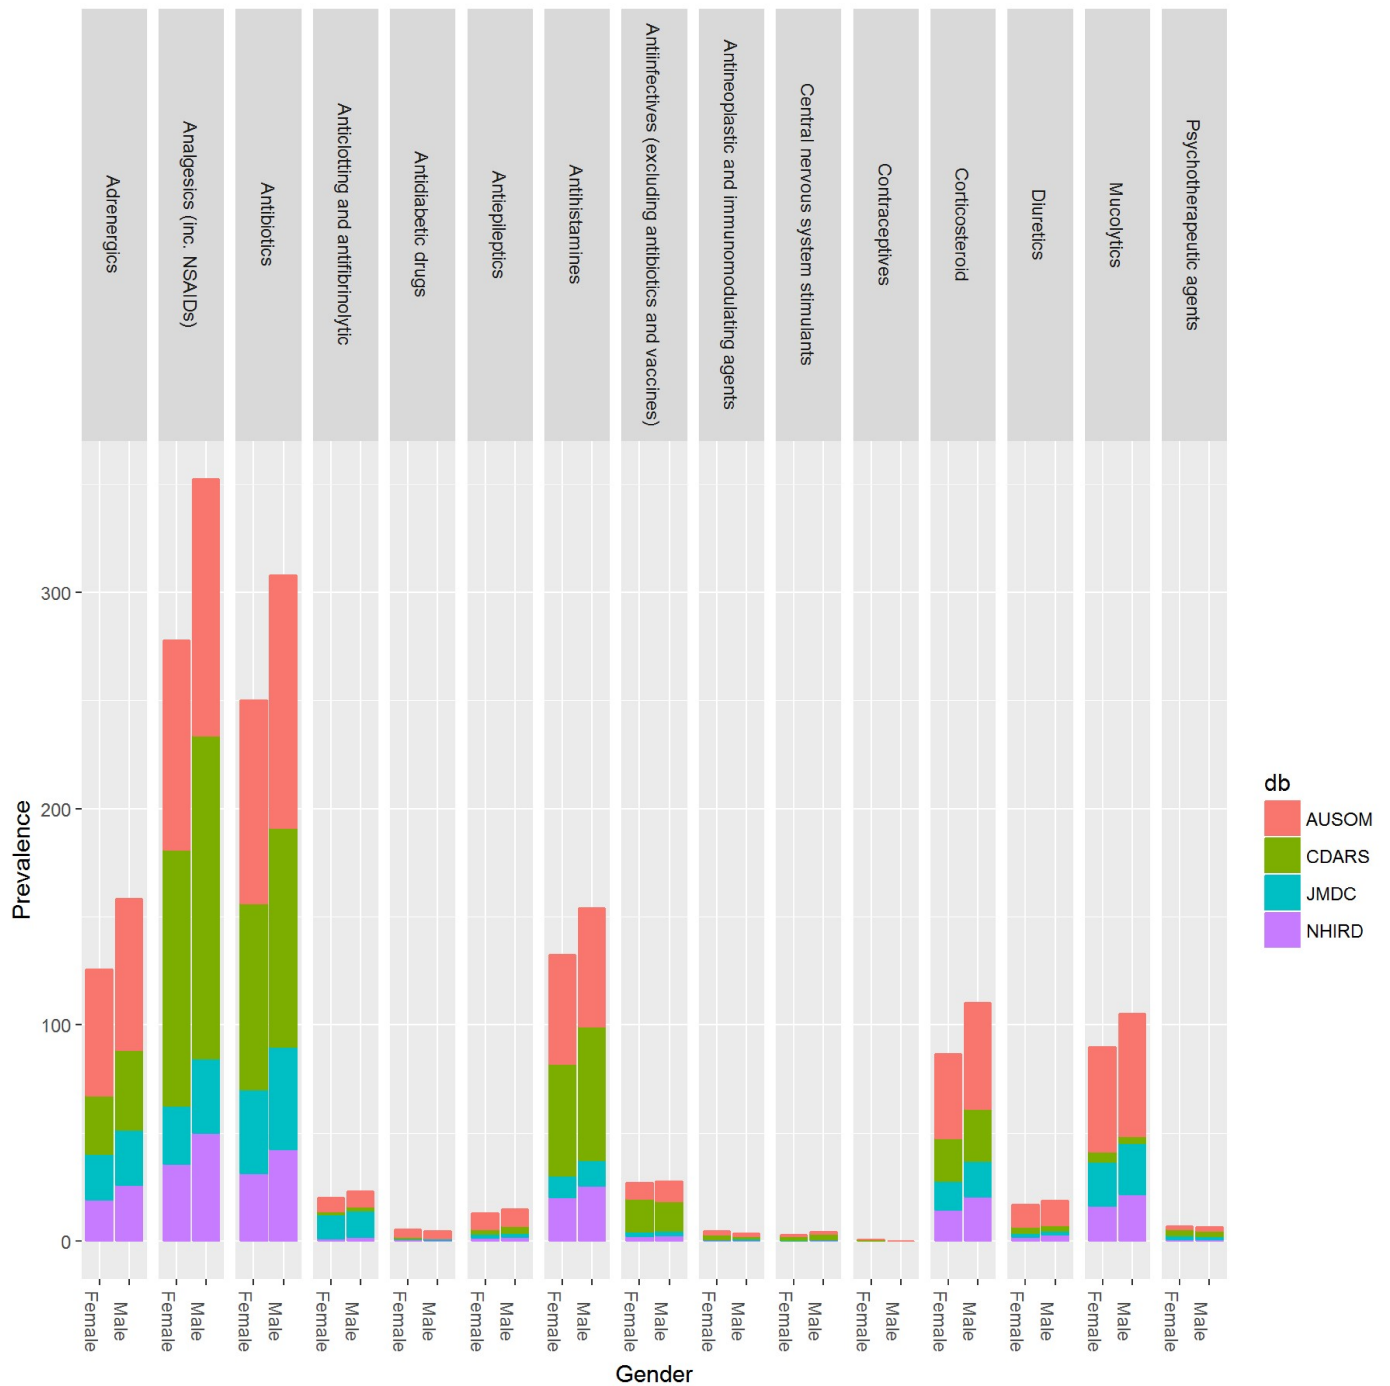

Figure: User prevalence by therapeutic level (prevalence per 1000 persons) and gender in an inpatient setting
