# Supplementary material
Source: HighWire-hosted journal article supplement (https://bmjopen.bmj.com/content/10/1/e032426)
Supplement: inline-supplementary-material-3 [file inline-supplementary-material-3.pdf]

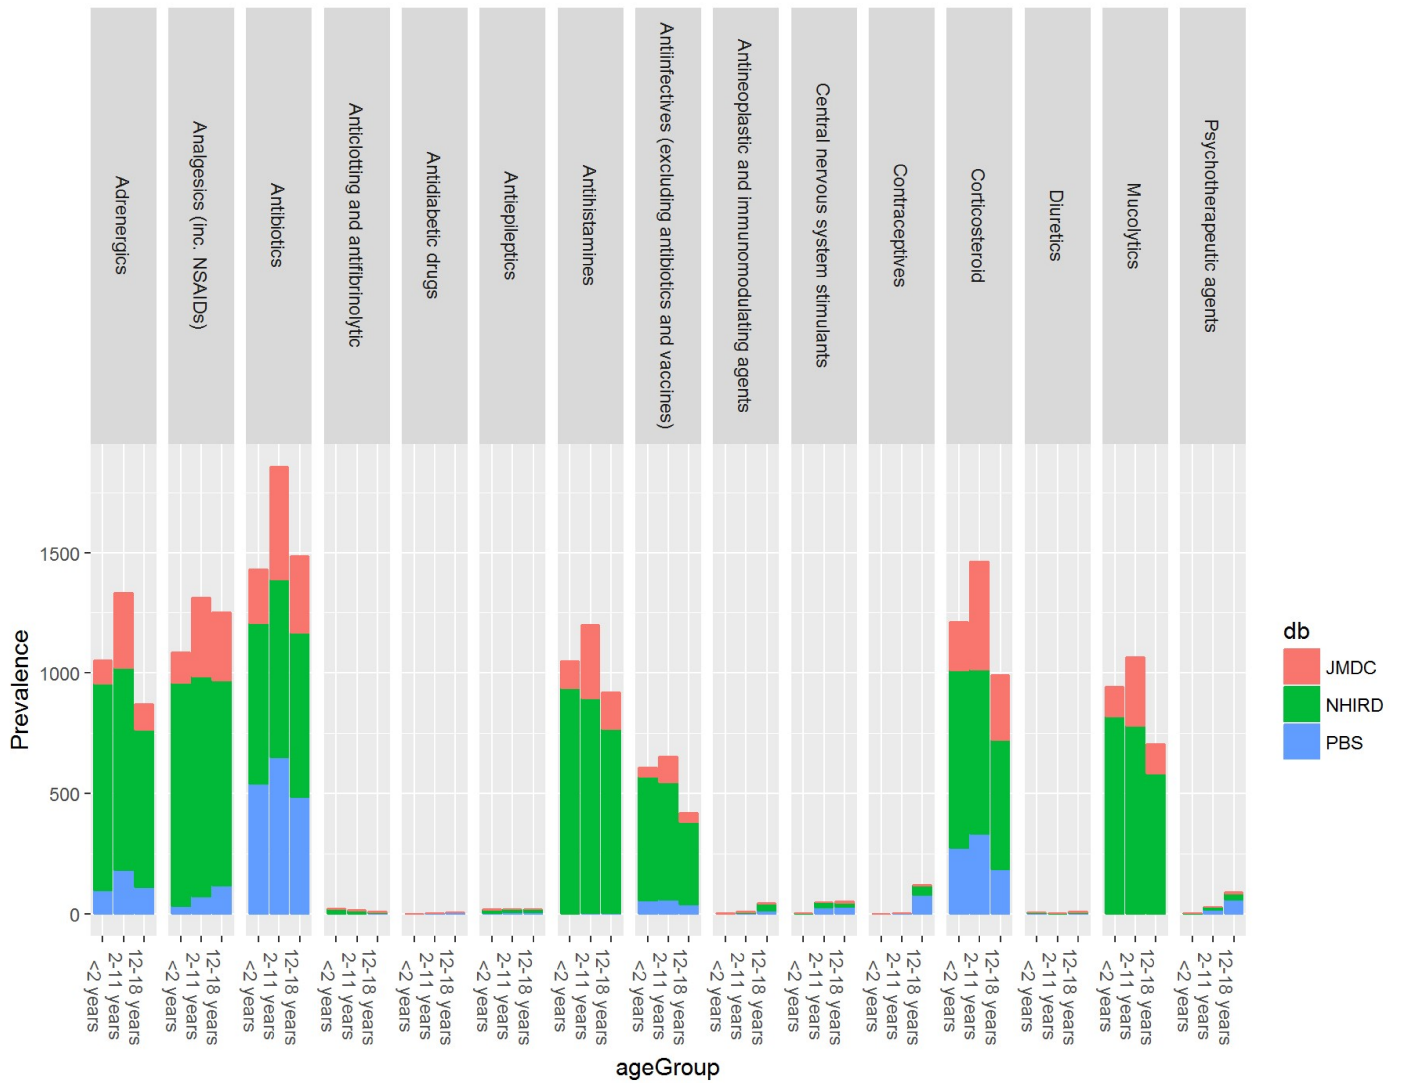

Figure: User prevalence by therapeutic level (prevalence per 1000 persons) and age in an ambulatory setting
